1 **Running title:** How do three TaGS1 perform their role?

2 **Title:** How do three cytosolic glutamine synthetase isozymes of wheat perform N  
3 assimilation and translocation?

4 **Authors:**

5 Yihao Wei<sup>1</sup>, email: yc\_yihao@163.com

6 Xiaochun Wang<sup>1,2,3</sup>, email: xiaochun.w@163.com

7 Telephone: 086-13783586761

8 Zhiyong Zhang<sup>1</sup>, email: zyoung1988@126.com

9 Shuping Xiong<sup>1</sup>, email: shupxiong@163.com

10 Yiming Zhang<sup>2</sup>, email: zyiming567@163.com

11 Lulu Wang<sup>1</sup>, email: wanglulu9501@163.com

12 Xiaodan Meng<sup>1</sup>, email: mengxd13@163.com

13 Jie Zhang<sup>1</sup>, email: zhangjie135239@163.com

14 Xinming Ma<sup>1</sup>, email: xinmingma@126.com

15 Telephone: 086-13937100780

16 **Address:**

17 1. Collaborative Innovation Center of Henan Grain Crops, College of  
18 Agronomy, Henan Agriculture University, Zhengzhou, China;

19 2. Department of Biochemistry and Molecular Biology, College of Life  
20 Science, Henan Agriculture University, Zhengzhou, China;

21 3. State Key Laboratory of Wheat and Maize Crop Science in China, Henan  
22 Agriculture University, Zhengzhou, China

23 **Submission date:** 11/8/2019

24 **The number of tables:** 1 table in text and 4 tables in supplementary data.

25 **The number figures:** 6 figures in text, Fig.2, Fig. 5 and Fig.6 are in color in print.

26 Fig.2, Fig. 3, Fig. 4, Fig. 5 and Fig.6 are in color online. 2 figures in supplementary

27 data, all are in color online.

28 **The total word count:** 6144

29 **Highlight:** Three cytosolic glutamine synthase isozymes of wheat have different role

30 and synergistically perform nitrogen assimilation and translocation.

31

32

33

34

35 **Abstract**

36 To understand how the three cytosolic glutamine synthetase (GS1) isozymes of wheat  
37 (*Triticum aestivum* L., TaGS1) perform nitrogen assimilation and translocation, we  
38 studied the kinetic properties of TaGS1 isozymes, the effects of nitrogen on the  
39 expression and localization of TaGS1 isozymes with specific antibodies, and the  
40 nitrogen metabolism. The results showed TaGS1;1, the dominant TaGS1 isozyme, had  
41 a high affinity for substrates, and was widely localized in the mesophyll cells, root  
42 pericycle and root tip meristematic zone, suggesting it was the primary isozyme for N  
43 assimilation. TaGS1;2, with a high affinity for Glu, was activated by Gln, and was  
44 mainly localized in the around vascular tissues, indicating that TaGS1;2 catalyzed Gln  
45 synthesis in low Glu concentration, then the Gln returned to activate TaGS1;2, which  
46 may lead to the rapid accumulation of Gln around the vascular tissues. TaGS1;3 had  
47 low affinity for substrates but the highest  $V_{max}$  among TaGS1, was mainly localized in  
48 the root tip meristematic zone; exogenous  $NH_4^+$  could promote TaGS1;3 expressing,  
49 indicating that TaGS1;3 could rapidly assimilate  $NH_4^+$  to relieve  $NH_4^+$  toxicity. In  
50 conclusion, TaGS1;1, TaGS1;2 and TaGS1;3 have different role in N assimilation, Gln  
51 translocation and relieving ammonium toxicity, respectively, and synergistically  
52 perform nitrogen assimilation and translocation.

53 **Key words:** assimilation, cytosolic glutamine synthetase, kinetic property,  
54 localization, nitrogen, translocation, wheat

55 **Abbreviations:** GS, glutamine synthetase;  $NH_4^+$ , ammonium;  $NO_3^-$ , nitrate; NUE,  
56 nitrogen use efficiency; CDS, coding sequence; TLC, thin layer chromatography.

57

## 58 **Introduction**

59 Wheat (*Triticum aestivum* L.) is one of the three main cereals cultivated  
60 worldwide. Nitrogen (N) is an important limiting factor for the yield and quality of  
61 wheat, and large quantities of nitrogen fertilizers are required to attain maximal  
62 growth and productivity (Kaur *et al.*, 2015; Kichey *et al.*, 2006). To increase crop  
63 production in line with human population growth, nitrogen fertilizers are being  
64 applied excessively, leading to severe nitrogen pollution on a global scale (Kant *et al.*,  
65 2010; Robertson and Vitousek, 2009). Therefore, there is a need to improve nitrogen  
66 use efficiency (NUE) to make agriculture more sustainable (Kant *et al.*, 2010;  
67 Thomsen *et al.*, 2014).

68 In order to improve crop NUE, glutamine synthetase (GS; EC 6.3.1.2) has been  
69 studied numerous times owing to its essential role in the assimilation of inorganic N  
70 (Bernard *et al.*, 2008; Fuentes *et al.*, 2001; Kichey *et al.*, 2006; Martin *et al.*, 2006;  
71 Nigro *et al.*, 2016; Tobin *et al.*, 1985). Understanding the physiological functions of  
72 GS is crucial to modulate nitrogen metabolism and to screen for germplasm with  
73 enhanced NUE (Bernard *et al.*, 2008). Plant GS is classified into two groups  
74 according to its subcellular location: the cytosolic glutamine synthetase isoform (GS1)  
75 and the chloroplastic glutamine synthetase isoform (GS2) (Goodall *et al.*, 2013; Sun  
76 *et al.*, 2015). GS2 is encoded by a single gene and plays a clear role in assimilating  
77 ammonium ( $\text{NH}_4^+$ ) derived from photorespiration and nitrate ( $\text{NO}_3^-$ ) reduction  
78 (Wallsgrave *et al.*, 1987), while GS1 is encoded by a multigene family and plays  
79 nonredundant and complex roles related to N assimilation and recycling (Bernard and  
80 Habash, 2009).

81 In Arabidopsis, GS1 is encoded by five individual isogenes with distinct  
82 affinities for  $\text{NH}_4^+$  and glutamate and tissue localization as well as distinct  
83 physiological functions (Guan *et al.*, 2016; Guan *et al.*, 2015; Ishiyama *et al.*, 2004b;  
84 Konishi *et al.*, 2017; Lothier *et al.*, 2011; Moison *et al.*, 2018). Phylogenetically, the

85 nucleotide and amino acid sequences of these isoforms do not cluster with GS1  
86 sequences from cereals (Thomsen *et al.*, 2014). The function of Arabidopsis and  
87 cereal GS1 isogenes can thus not be compared directly, highlighting the importance of  
88 studying crop species to improve crop NUE.

89 Expression analyses and knockout studies of individual GS1 isogenes have  
90 demonstrated that they have specific spatial distribution and play essential roles in  
91 plant development and yield structure in rice (*Oryza sativa*), and maize (*Zea mays*)  
92 (Thomsen *et al.*, 2014). Rice has three isogenes for *GS1* (*OsGS1;1-3*). Knockout of  
93 *OsGS1;1*, which localizes to vascular tissues of mature leaves, showed severe  
94 retardation in growth rate and grain filling (Kusano *et al.*, 2011; Tabuchi *et al.*, 2005).  
95 Knockout of *OsGS1;2*, which localizes to surface cells of roots in an  $\text{NH}_4^+$ -dependent  
96 manner, showed a marked decrease in contents of Gln and asparagine (Asn), but  
97 increase in  $\text{NH}_4^+$  content in the root and xylem sap, indicating that *OsGS1;2* is  
98 important in the primary assimilation of  $\text{NH}_4^+$  taken up by rice roots (Funayama *et al.*,  
99 2013; Ishiyama *et al.*, 2004a). Real time PCR indicated that *OsGS1;3* is mainly  
100 expressed in the spikelet, indicating that it is probably important in grain ripening  
101 and/or germination (Yamaya and Kusano, 2014).

102 Maize has five isogenes for *GS1* (*ZmGln1;1-5*), but only *ZmGln1-3* and  
103 *ZmGln1-4* have been study so far. *ZmGln1-3* in the mesophyll cells is constitutively  
104 expressed until a very late stage of leaf development, indicating a role in the synthesis  
105 of Gln following  $\text{NO}_3^-$  reduction until plant maturity (Hirel *et al.*, 2005; Martin *et al.*,  
106 2006). *ZmGln1-4* in the bundle sheath cells was up-regulated in older leaves,  
107 indicating a role in the reassimilation of  $\text{NH}_4^+$  released during protein degradation in  
108 senescing leaves (Martin *et al.*, 2005; Martin *et al.*, 2006). Furthermore, knockout of  
109 *ZmGln1-3* and *ZmGln1-3* results in reduced kernel number and kernel size,  
110 respectively (Cañas *et al.*, 2010; Martin *et al.*, 2006).

111 However, it is hard to study the function of TaGS1 isozymes in the allohexaploid

112 wheat using gene knockout technology. Therefore, both the precise functions of  
113 individual TaGS1 isozymes and how they perform nitrogen assimilation and  
114 translocation are not clear. This makes it difficult to achieve goal of improving wheat  
115 NUE. On the bases of phylogenetic studies and mapping data in wheat, ten GS cDNA  
116 sequences are classified into four subfamilies denominate GS1 (a, b, and c), GS2 (a, b,  
117 and c), GSr (1 and 2), and GSe (1 and 2) (Bernard *et al.*, 2008; Thomsen *et al.*, 2014).  
118 We re-named GS1, GSr, and GSe genes as TaGS1;1, TaGS1;2, and TaGS1;3,  
119 respectively, according to phylogenetic tree analysis (Thomsen *et al.*, 2014). TaGS1;1  
120 transcript is present in the per fascicular sheath cells, increase from anthesis, and can  
121 be upregulated in response to a reduction in N supply. Contrastingly, TaGS1;2  
122 transcripts are confined to the vascular cells, remain at steady levels until a late stage  
123 of development, and are downregulated under N starvation (Bernard *et al.*, 2008;  
124 Caputo *et al.*, 2009). During leaf senescence, TaGS1;1 and TaGS1;2 are the  
125 predominant isoforms, suggesting major roles in assimilating ammonia during the  
126 critical phases of remobilization of nitrogen to the grain (Bernard *et al.*, 2008). The  
127 transcription level of TaGS1;3 is very low compared to other TaGS1 genes and its  
128 functions are still not known (Bernard *et al.*, 2008; Caputo *et al.*, 2009).

129       Since TaGS1 genes are highly homologous and their gene products were  
130 indistinguishable at the protein levels by GS antibodies, previous studies about  
131 individual TaGS1 isozyme only focus on the transcription level (Bernard *et al.*, 2008;  
132 Caputo *et al.*, 2009; Goodall *et al.*, 2013; Zhang *et al.*, 2017). However, as an enzyme,  
133 GS catalytic activity requires a process going from DNA, mRNA, and protein to  
134 subunit assembly into holoenzymes. The regulation of each step of these processes  
135 will affect the GS activity (Thomsen *et al.*, 2014). Therefore, studying the localization  
136 and expression pattern of individual GS isozyme at the protein level will be more  
137 conducive to understanding its function. Studies on the kinetic properties of individual  
138 GS isozymes in Arabidopsis and rice showed that the affinity to substrates and the  
139 ability to synthesize Gln significantly differed among GS isozymes (Ishiyama *et al.*,

140 2004a; Ishiyama *et al.*, 2004b). However, the kinetic properties of the individual GS1  
141 isoenzymes have not been well characterized in wheat. In order to better understand  
142 the precise functions of individual TaGS1 isozymes and how they perform nitrogen  
143 assimilation and translocation, we studied the kinetic properties of TaGS1 isozymes,  
144 the effects of nitrogen on the expression and localization of TaGS1 isozymes with  
145 specific antibodies, and the nitrogen metabolism. Based on these new data, we  
146 discovered that three TaGS1 isozymes have different role and synergistically perform  
147 nitrogen assimilation and translocation. The results of this study are expected to  
148 provide directions for improving nitrogen use efficiency of wheat, which would in  
149 turn, abate N pollution arising from the use of excess N fertilizers.

## 150 **Materials and methods**

### 151 **Expression of recombinant wheat GS protein in *E. coli***

152 The CDS (Coding Sequence) region of *TaGS1;1*, *TaGS1;2*, *TaGS1;3*, and *TaGS2*  
153 were obtained from wheat cultivar Yumai 49, and they were respectively cloned into  
154 the pET21a vector in our previous study (Gu *et al.*, 2018). The recombinant wheat GS  
155 protein was induced in accordance with a method described by Gu *et al.* (2018). After  
156 induction, cells were harvested by centrifugation at 5000 g for 10 min at 4 °C. The  
157 pellet was suspended in breaking buffer (10 mmol/L Tris, 10 mmol/L MgCl<sub>2</sub>, 0.05 %  
158 Triton X-100, 100 µg/mL PMSF, pH 7.5) and sonicated using an ultrasonic  
159 homogenizer JY92-2D (Ningbo Scientz Biotechnology Co. Ltd., Ningbo, China). The  
160 lysate was centrifuged at 12000 g for 15 min at 4 °C and the supernatants were  
161 collected and used for kinetic measurements. Supernatant was kept on ice until used.

162 GS abundance in the supernatant was detected using Western-blot. GS  
163 polypeptides were detected using polyclonal antibodies raised against both wheat GS1  
164 and GS2. The relative content of GS was estimated by grey scanning using Image Lab  
165 analyzer software (Version 5.1, Bio-Rad Laboratories, CA, USA).

### 166 **In vitro assay of individual recombinant wheat GS isozymes activity**

167 Determination of GS enzyme activity was based on an in vitro modified  
168 synthetase reaction, where the amount of produced  $\gamma$ -glutamyl monohydroxamate  
169 (GMH) is detectable by a stop reaction (Ma *et al.*, 2005; Németh *et al.*, 2018).

170 The crude extract of wheat GS protein recombinant *E. coli* was added into 800  
171  $\mu$ L Reagent buffer. The reaction mixture was incubated at 25 °C for 15 min,  
172 terminated by adding 800  $\mu$ L stop solution (123 mM FeCl<sub>3</sub>, 49 mM trichloroacetic  
173 acid, and 217 mM HCl) after centrifuging at 12000 g for 5 min, and the absorbance of  
174 supernatants at 540 nm was determined. Reagent buffer always contained 40 mM  
175 magnesium sulfate and basically 100 mM imidazole, 50 mM ATP, 40 mM  
176 hydroxylamine, and 50 mM Na-glutamate but concentrations varied depending on the  
177 actual kinetic assay (i.e., Na-glutamate: 0–120 mM; glutamine: 0–60 mM;  
178 hydroxylamine: 0–80 mM).

### 179 **Design and preparation of antibodies against individual wheat GS isozymes**

180 DNA Star was used to compare the amino acid sequences of TaGS1;1, TaGS1;2,  
181 TaGS1;3, and TaGS2 (Fig. S1). The hydrophilic and surface accessibility and  
182 antigenicity of these polypeptide sequences with low homology were analyzed with  
183 Protean (Table S1). The polypeptide sequences with strong antigenic, hydrophilic, and  
184 surface accessibility were selected as individual wheat GS isozymes antigenic  
185 polypeptides, i.e., TaGS1;1: KDGGFKVIVDAVEKLLKHKHE; TaGS1;2:  
186 EAGGYEVIKTAIEKLGKRHAQ; TaGS1;3: LSKAGLSNGK; TaGS2:  
187 TLEAEALAAKLLALKV. These antigenic polypeptides were synthesized and  
188 polyclonal antibodies against individual wheat GS isozymes were prepared by  
189 Zoonbio (Zoonbio Biotechnology Co., Ltd., Nanjing, China). To prepare polyclonal  
190 antibodies against wheat GS protein, the purified recombinant protein antigen of  
191 TaGS1;1 and TaGS2 was used.

### 192 **Plants growth conditions and experimental design**

193 For hydroponic treatments, uniform seeds were selected, surface sterilized with



194 75 % (v/v) ethanol for 1 min, rinsed with distilled water, and then germinated in  
195 culture dishes covered with wet sterilized filter paper until the seed root length was  
196 about 1 cm. The uniform seedlings were transplanted to opaque containers and  
197 cultivated in distilled water. The hydroponic culture was carried out in a growth  
198 chamber with the following conditions: 22 °C ± 2 °C, 50 % to 70 % relative humidity,  
199 a photon fluence rate of 300 μmol photons m<sup>-2</sup> s<sup>-1</sup>, and a 16h light period. After three  
200 days, the seedlings were separated and grown on a modified Hoagland nutrient  
201 solution (Table S2), with NH<sub>4</sub><sup>+</sup> or NO<sub>3</sub><sup>-</sup> as the sole N source at concentrations of 0, 0.2,  
202 2, 5, 10, and 20 mM. Each container contains 10 plants with 0.5 L nutrient, which was  
203 replaced every 3d. After 12 days, the shoots and roots were harvested individually and  
204 immediately frozen in liquid nitrogen, then stored at -80 °C for further experiments. In  
205 parallel, leaves and roots were selected, and immediately immersed in fixative for the  
206 immunolocalization studies.

#### 207 **RNA Isolation and quantitative real-time PCR**

208 Total RNA was extracted from the plant tissue using TRIzol Reagent (Thermo  
209 Scientific). The cDNA was synthesized using the Hiscript 1st Strand cDNA Synthesis  
210 Kit (Vazyme). Quantitative real-time PCR (qPCR) was performed on Step One  
211 Real-Time PCR System (Life Technologies Corporation, CA, USA), and AceQ qPCR  
212 SYBR Green Master Mix (Vazyme) for the assay. All the primers (Sangon) used are  
213 shown in Table S3. The relative expression levels of the genes were calculated using  
214 the TaATPases (Ta54227) and TaTEF (Ta53964) gene (Paolacci *et al.*, 2009) as  
215 internal control.

#### 216 **GS Activity Assay and Western blotting**

217 The total GS activity was measured in accordance with a method described by  
218 Ma *et al.* (2005). Soluble protein content was determined by the Coomassie blue  
219 dye-binding method using bovine serum albumin as a standard.  
220 Native-polyacrylamide gel electrophoresis (PAGE) and in-gel GS activity staining

221 were performed as previously described (Zhang *et al.*, 2017). Western blotting was  
222 performed in accordance with a method described by Wei *et al.* (2018). The dilution  
223 ratio of antibody applied to the membrane is indicated in the figure legends.

#### 224 **Metabolite Analysis**

225 Amino acid, ammonium, and nitrate were determined according to Wei *et al.*  
226 (2018). Total N content determined using SEAL AutoAnalyzer 3 continuous flow  
227 analytical system (Bran + Luebbe, Hamburg, Germany), in accordance with the  
228 manufacturer's instructions. Soluble sugar was determined using the anthrone  
229 colorimetric method (Tang, 1999).

230 The amino acid components were analyzed with thin layer chromatography  
231 (TLC). Amino acids were identified with phenol-water (3:1) as a developing solvent  
232 in silica gel G plate and using 0.5 % ninhydrin n-butyl alcohol solution as the  
233 visualization reagent. Total free amino acid extracted from the shoot or root tissues  
234 (1.5 µg) were loaded onto each lane of the TLC.

#### 235 **Immunolocalization using indirect immunofluorescence analysis**

236 These tissues of leaf, root and root tip were fixed in FAA fixative at least 24h.  
237 Embedded in paraffin, section and immunofluorescence were prepared by Servicebio  
238 (Wuhan Servicebio technology Co., Ltd., Hubei, China). Anti-TaGS1;1, anti-TaGS1;2,  
239 anti-TaGS1;3, and anti-TaGS2 antibodies diluted 1:200, 1:200, 1:500 and 1:50,  
240 respectively, in blocking solution.

#### 241 **Statistics**

242 One-way analysis of variance with a Duncan post hoc test was performed using  
243 SPSS version 13.0 (IBM, Chicago, IL, USA).

#### 244 **Accession numbers**

245 The locus numbers for wheat GS cDNA are as follows: *TaGS1;1* (DQ124209),

246 *TaGS1;2* (AY491968), *TaGS1;3* (AY491970), *TaGS2* (DQ124212).

247

## 248 **Results**

249 **The individual wheat GS isozymes are distinguishable at the protein level with**  
250 **TaGS specific antibody.**

251 The individual recombinant wheat GS protein loaded in the gel was adjusted to a  
252 uniform level using polyclonal antibodies raised against wheat GS (Fig. 1A). Then,  
253 the specificity of antibodies against individual wheat GS isozymes was tested. The  
254 results showed that anti-TaGS1;1, anti-TaGS1;2, anti-TaGS1;3, and anti-TaGS2  
255 antibodies were monospecific to TaGS1;1, TaGS1;2, TaGS1;3, and TaGS2  
256 polypeptides, respectively, with an antibody dilution ratio of 1:30000, 1:30000,  
257 1:10000, and 1:10000, respectively (Fig. 1A).

258 The anti-TaGS2 antibody was monospecific to TaGS2 polypeptide for only one  
259 band detected at about 42 kDa when wheat stem and leaf extract were analyzed by  
260 immunoblotting after SDS-PAGE; the antibodies of individual TaGS1 did not  
261 cross-react against TaGS2 polypeptide, as only one band at about 39 kDa was  
262 detected when wheat stem and leaf extract were analyzed by immunoblotting (Fig.  
263 1B).

## 264 **Kinetic properties of recombinant TaGS isoforms**

265 Kinetics of GS activities of recombinant TaGS1;1, TaGS1;2, TaGS1;3, and  
266 TaGS2 were plotted against the concentration of glutamate (Glu), hydroxylamine, and  
267 Gln in the reaction mixture (Fig. 2). TaGS1;2 activity was significantly inhibited  
268 when Glu was supplied at the concentrations higher than 6 mM (Fig. 2A), and was  
269 very weak at the different concentrations of hydroxylamine when Glu was supplied at  
270 the 50 mM (Fig. 2B). However, TaGS1;2 activity was not inhibited when Glu was  
271 supplied at concentrations lower than 5 mM (Fig. 2D) and was significantly increased

272 at the different concentrations of hydroxylamine when Glu was supplied at the 5 mM  
273 (Fig. 2E). With increasing Gln concentrations, the activities of TaGS1;3 and TaGS2  
274 remained stable. Contrastingly, in the reaction mixture with 60 mM Gln, the activity  
275 of TaGS1;1 and TaGS1;2 was increased to about 2 and 6 times the activity in the  
276 reaction mixture without Gln, respectively (Fig. 2C).

277 The specific activities plotted against the substrate concentrations showed  
278 saturation kinetics, which followed the Michaelis-Menten equations, and the kinetic  
279 constants were calculated (Table 1). The four TaGS isoenzymes can be classified into  
280 different groups by the affinities to substrates. TaGS1;1 ( $K_m = 0.65 \pm 0.01$  mM) and  
281 TaGS1;2 ( $K_m = 0.87 \pm 0.01$  mM) can be classified as isoenzymes with high affinity to  
282 Glu, while TaGS1;3 and TaGS2 exhibited a low affinity to Glu ( $K_m$  values;  $4.13 \pm$   
283  $0.35$  mM and  $2.43 \pm 0.27$  mM, respectively). As for hydroxylamine, TaGS1;1 ( $K_m =$   
284  $0.26 \pm 0.02$  mM) and TaGS2 ( $K_m = 0.36 \pm 0.04$  mM) showed high substrate affinity  
285 than TaGS1;2 ( $K_m = 0.66 \pm 0$  mM) and TaGS1;3 ( $K_m = 0.64 \pm 0.04$  mM).

286 The relative GS protein content of recombinant wheat GS isozymes crude extract  
287 was determined by analyzing the Western-blot results using Image Lab (Fig. 2F), the  
288 results showed a TaGS1;1 : TaGS2 : TaGS1;2 : TaGS1;3 ratio of 1 : 0.1 : 0.63 : 0.06.  
289 Based on the relative content of different TaGS isozymes, we calculated the  $V_{max}$  of  
290 each TaGS isozymes. The  $V_{max}$  of TaGS1;3 was the highest, about 10-fold, 3-fold, and  
291 2-fold of TaGS1;1, TaGS1;2, and TaGS2, respectively (Table 1).

## 292 **Effects of nitrogen nutrition on individual TaGS gene expression**

293 The responses of GS genes to N nutrition are crucial to understand their role in N  
294 metabolism. The relative abundances of the mRNA and subunit of individual GS  
295 isozymes in wheat seedling were determined by real time PCR and Western blot  
296 analyses.

297 *The expression pattern of individual TaGS at the transcript level*

298 The TaGS1;1 transcript was the highest among all TaGS1 genes (Fig. 3A),  
299 suggesting that TaGS1;1 was the dominant TaGS1 isoform in the shoot and root. And  
300 TaGS1;1 transcript was higher under 0 - 0.2 mM N supply than under 2 - 20 mM N  
301 supply (Fig. 3A).

302 The TaGS1;2 transcript in the shoot was much lower than that in root, and was  
303 not affected by N treatments (Fig. 3B). In the root, TaGS1;2 transcript was the highest  
304 under 0.2 mM  $\text{NH}_4^+$  supply, and decreased with increasing  $\text{NH}_4^+$  supply (Fig. 3B).  
305 However, the TaGS1;2 transcript in root did not significantly change with increasing  
306  $\text{NO}_3^-$  supply, and was significantly lower than under  $\text{NH}_4^+$  supply (Fig. 3B).

307 The TaGS1;3 transcript increased with increasing N supply in the shoot, but was  
308 very lower than that in the root (Fig. 3C). In roots, with increasing  $\text{NO}_3^-$  supply, the  
309 TaGS1;3 transcript increased, but it was significantly lower than under  $\text{NH}_4^+$  supply  
310 (Fig. 3C). And the TaGS1;3 transcript in root was higher under 2 - 20mM  $\text{NH}_4^+$  than  
311 under 0.2 mM  $\text{NH}_4^+$  supply (Fig. 3C), indicating that high  $\text{NH}_4^+$  concentration can  
312 induce the expression of TaGS1;3 in roots.

313 The TaGS2 transcript was much higher in the shoot than that in the root (Fig.  
314 3D). In the shoot, TaGS2 transcript was higher under 2 - 20 mM N supply than under  
315 0 - 0.2 mM (Fig. 3D). When under 2 - 20 mM N supply, the TaGS2 transcript was  
316 significantly higher under  $\text{NO}_3^-$  than under  $\text{NH}_4^+$  supply. Interestingly, when under 2 -  
317 20 mM  $\text{NO}_3^-$  supply, TaGS2 transcript in the root was significantly higher than  
318 without N or under  $\text{NH}_4^+$  supply (Fig. 3D).

### 319 *The expression pattern of individual TaGS subunit*

320 Western blots analysis using polyclonal antibodies raised against GS of wheat,  
321 showed that GS2 was the predominant isoform in the shoot and GS1 was the  
322 predominant isoform in the root (Fig. 3E, F). In the shoot, TaGS2 subunit level  
323 increased with increasing N supply (Fig. 3E). In the root, TaGS1 subunit decreased  
324 with increasing N supply (Fig. 3F). Furthermore, TaGS2 subunit could be detected in

325 root only when  $\text{NO}_3^-$  concentration was greater than 0.2 mM, indicating that TaGS2 in  
326 the root was specifically induced by high concentration  $\text{NO}_3^-$  (Fig. 3F).

327 In the shoot, TaGS1;1 subunit abundance decreased with increasing N supply,  
328 becoming difficult to detect when  $\text{NH}_4^+$  concentration was greater than 2 mM (Fig.  
329 3E). In the roots, TaGS1;1 subunit decreased with increasing  $\text{NH}_4^+$  supply but it did  
330 not significantly change with increasing  $\text{NO}_3^-$  supply (Fig. 3F). Less TaGS1;2 subunit  
331 was detected in the shoot while much TaGS1;2 were detected in the root. Furthermore,  
332 TaGS1;2 subunit increased with increasing  $\text{NO}_3^-$  supply in the root, but it first  
333 increased and then decreased with increasing  $\text{NH}_4^+$  supply (Fig. 3E, F). The TaGS1;3  
334 subunit was very low in the shoot and root, and it was higher under  $\text{NH}_4^+$  than under  
335  $\text{NO}_3^-$  supply (Fig. 3E, F).

#### 336 **Effects of nitrogen nutrition on GS isozymes activity and total GS activity**

337 In previous studies, the cytosolic GS1 holoenzyme was ~490 kDa, and the  
338 chloroplastic GS2 holoenzyme was ~240 kDa (Wang *et al.*, 2015). Therefore, the  
339 isoforms showed different mobilities in gels (GS2 > GS1). In the shoot, the activity of  
340 both GS1 and GS2 isozymes could be detected, but only GS1 isozymes activity could  
341 be detected in the root (Fig. 3G). GS1 activity in the shoot was significantly higher  
342 under  $\text{NO}_3^-$  than under  $\text{NH}_4^+$  supply. However, GS1 activity in the root was  
343 significantly lower under  $\text{NO}_3^-$  than under  $\text{NH}_4^+$  supply (Fig. 3G). Moreover, the GS1  
344 activity in the root reached its peak at 10 mM  $\text{NH}_4^+$  (Fig. 3G).

345 The total GS activity in the shoot was significantly higher than that in the root,  
346 and the total GS activity in the root was significantly higher under  $\text{NH}_4^+$  than under  
347  $\text{NO}_3^-$  supply, and increased significantly by high concentration  $\text{NH}_4^+$  (Fig. 3H).

#### 348 **Effects of nitrogen nutrition on C/N metabolite status**

349 Without N supply, the shoot growth was significantly inhibited, while the root  
350 growth was significantly promoted (Table S4). The free  $\text{NH}_4^+$ , producing by its own

351 metabolic process, was significantly higher in the root than in the shoot (Fig. 4A).  
352 Soluble sugar, the main product of photosynthesis, also accumulated in the roots (Fig.  
353 4B). In the root and shoot, the free amino acid (Fig. 4C), soluble protein (Fig. 4D),  
354 and total nitrogen content (Table S4) were lower than those under nitrogen sufficiency,  
355 showing that nitrogen assimilation was inhibited under nitrogen deficiency.

356 Under 0.2 mM  $\text{NO}_3^-$  supply,  $\text{NO}_3^-$  was preferentially accumulated in the shoot  
357 (Fig. S2). With increasing  $\text{NO}_3^-$  concentration, the content of  $\text{NO}_3^-$  in the shoot and  
358 root and the content of free  $\text{NH}_4^+$  in the root gradually increased (Fig. S2 and Fig. 4A),  
359 but the content of the organic nitrogen (free amino acid, and soluble protein) did not  
360 show an increasing trend (Fig. 4C, D), which indicated that nitrogen was mainly  
361 stored as inorganic nitrogen with increasing  $\text{NO}_3^-$  supply.

362 Under  $\text{NH}_4^+$  supply, the content of free  $\text{NH}_4^+$  in the root was significantly higher  
363 than in the shoot and increased with increasing  $\text{NH}_4^+$  supply (Fig. 4A), but the content  
364 of organic nitrogen (free amino acid, and soluble protein) in the shoot was  
365 significantly higher than in the root and increased with increasing  $\text{NH}_4^+$  supply (Fig.  
366 4C, D), suggesting that  $\text{NH}_4^+$  was mainly stored in the root while organic nitrogen  
367 was mainly stored in the shoot with increasing  $\text{NH}_4^+$  supply.

368 Under 2 - 20 mM N supply, the content of soluble sugar in the root was higher  
369 than that in the shoot under  $\text{NH}_4^+$  supply, but it was lower than in the shoot under  
370  $\text{NO}_3^-$  supply (Fig. 4D), indicating that the root needs more carbohydrates to assimilate  
371  $\text{NH}_4^+$  under  $\text{NH}_4^+$  supply. From 2 to 20 mM nitrogen, the amino acids content in plant  
372 under  $\text{NH}_4^+$  supply was about 2–3 times that under  $\text{NO}_3^-$  supply and the amino acids  
373 contents in the shoot gradually increased with increasing  $\text{NH}_4^+$  supply (Fig. 4C).  
374 Moreover, the soluble protein content in plant under  $\text{NH}_4^+$  supply was significantly  
375 higher than under  $\text{NO}_3^-$  supply (Fig. 4D). These results indicate that the N  
376 assimilation was enhanced in  $\text{NH}_4^+$ -fed wheat.

377 The components of free amino acid extracted from the shoot and root tissues

378 were separated with thin layer chromatography (TLC) and stained with ninhydrin, and  
379 the main components were Gln, asparagine (Asn), Glu, and aspartate (Asp) (Fig. 4E,  
380 G). The relative proportion of Glu and Asp in the shoot and root were significantly  
381 higher under  $\text{NO}_3^-$  than under  $\text{NH}_4^+$  supply. However, the relative proportion of Gln  
382 and Asn in the shoot and root were significantly lower under  $\text{NO}_3^-$  than under  $\text{NH}_4^+$   
383 supply (Fig. 4E, G).

#### 384 **Effect of nitrogen on the tissue localization of individual TaGS**

385 Responses of tissue localization of TaGS to N nutrition are crucial to understand  
386 the role of individual TaGS in N metabolism. Without N supply, TaGS2 and TaGS1;1  
387 were the main isoforms and localized in the leaf mesophyll cells and TaGS1;1 was  
388 also localized in the surrounding vessels of xylem in the vein of leaf (Fig. 5A).  
389 TaGS1;2 was mainly localized in the surrounding vessels of xylem while no obvious  
390 TaGS1;3 was detected in the leaf (Fig. 5A). Only TaGS1;1 was detected in the  
391 vascular bundles in the maturation zone of roots (Fig. 6B), but abundant TaGS1;1 and  
392 TaGS1;3 were found in the meristematic zone of roots (Fig. 5C).

393 Under 5 mM  $\text{NO}_3^-$  supply, the tissue localization of individual TaGS in the leaves  
394 was very similar to that without N supply, but there were more TaGS2 and less  
395 TaGS1;1 in the mesophyll cells and no TaGS1;1 was detected in the surrounding  
396 vessels of xylem (Fig. 5D). In the maturation zone of roots, TaGS1;1 and TaGS2 were  
397 localized in the pericycle cell, and TaGS1;2 and TaGS1;3 were localized in the  
398 surrounding vessels of xylem (Fig. 5E). Moreover, abundant TaGS1;1, TaGS1;3, and  
399 TaGS2 were detected in the meristematic zone of roots (Fig. 5F).

400 Under 5 mM  $\text{NH}_4^+$  supply, the tissue localization of TaGS1;1, TaGS1;3, and  
401 TaGS2 in the leaves was the same with 5 mM  $\text{NO}_3^-$  supply. TaGS1;2 was localized in  
402 the surrounding vessels of xylem and phloem companion cells in the leaves (Fig. 5G).  
403 In the maturation zone of roots, TaGS1;1 and TaGS1;3 were localized in the pericycle  
404 cells, and TaGS1;2 and TaGS2 were not detected (Fig. 5H). In the corresponding site



405 of root tips in other treatments, the supposed root tip meristem under  $\text{NH}_4^+$  treatment  
406 was full of vascular tissue (Fig. 5I). There were abundant TaGS1;2, TaGS1;3, and  
407 TaGS1;1 in the endodermis, but no TaGS2 was detected (Fig. 5I). Moreover, TaGS1;2  
408 was detected in the surrounding vessels of xylem in the vascular bundle (Fig. 5I).

## 409 **Discussion**

410 This study was conducted to improve our understanding of the function of  
411 glutamine synthetases, which are critical in nitrogen metabolism in wheat, to be able  
412 to provide directions of improving nitrogen use efficiency in plants.  $\text{NO}_3^-$ , as an  
413 important source of nitrogen absorbed by wheat roots, was reduced into  $\text{NH}_4^+$  in  
414 leaves, and then was assimilated by GS2 in the chloroplast (Goodall *et al.*, 2013;  
415 Lothier *et al.*, 2011; Sivasankar and Oaks, 1996). Previous studies showed that the  
416 GS2 transcripts were in roots (Bernard *et al.*, 2008; Goodall *et al.*, 2013; Wei *et al.*,  
417 2018), but it was first time for us to discover that TaGS2 peptide and transcripts in  
418 wheat roots were induced by  $\text{NO}_3^-$  (Fig. 3D, F), and was localized in the pericycle  
419 cells (Fig. 5E) and the meristematic zone (Fig. 5F) of roots only under  $\text{NO}_3^-$  supply,  
420 which indicated that TaGS2 mainly participated in assimilation of ammonia from  
421  $\text{NO}_3^-$  reduction in the root.

422 It is important to study the enzymatic kinetics of TaGS isozymes to illustrate  
423 their biological function. Our study showed that recombinant TaGS1 isozymes had  
424 significantly different enzymatic kinetics. TaGS1;1 is one major isoform in wheat  
425 seedling (Fig. 3A, E, F), it showed high substrate affinity for Glu and hydroxylamine  
426 but its maximum reaction rate was lowest (Table 1). Previous studies showed that  
427 TaGS1;1 transcripts are present in the perifascicular sheath cells (Bernard *et al.*, 2008),  
428 but we found that TaGS1;1 peptide was mainly localized in the leaf mesophyll cells  
429 (Fig. 5A, D, G). In the mesophyll cells, ammonium released in mitochondria during  
430 photorespiration is reassimilated in the chloroplast by GS2 (Wallsgrave *et al.*, 1987).  
431 Oliveira *et al.* (2002) found that overexpression of cytosolic GS1 in leaf mesophyll

432 cells seems to provide an alternate route to chloroplastic GS2 for the assimilation of  
433 photorespiratory ammonium. therefore, we speculate that TaGS1;1 in mesophyll cells  
434 may participate in the reassimilation of ammonium released during photorespiration.  
435 In addition, TaGS1;1 was also localized in the pericycle and the meristematic zone of  
436 roots (Fig. 5), suggesting that TaGS1;1 was involved in assimilating inorganic  
437 nitrogen in roots and assimilating  $\text{NH}_4^+$  from the root tip metabolism process. The  
438 very wide tissue distribution and high expression of TaGS1;1 indicated that it was the  
439 primary TaGS1 isozyme for N assimilation.

440 A recent study showed that *AtGln1;3*, located in the pericycle of root in the  
441 Arabidopsis, is involved in xylem loading of Gln (Konishi *et al.*, 2017). But how it  
442 participates in the process is unclear. In the reaction mixture with 60 mM Gln, the  
443 activity of TaGS1;2 was increased to about 6 times of that without the Gln (Fig. 2C).  
444 As GS catalytic product, Gln has no feedback inhibition effect on TaGS1;2, but  
445 significantly enhanced the catalytic activity of TaGS1;2. Furthermore, TaGS1;2 has a  
446 high affinity for Glu (Table 1), which may indicate that TaGS1;2 catalyzes rapidly the  
447 synthesis of Gln, leading to the accumulation of Gln. TaGS1;2 was mainly localized  
448 around the vascular tissues (Fig. 5G, I), suggesting that TaGS1;2 can promote the  
449 accumulation of Gln around vascular tissues. Gln is the main translocation form of  
450 plant organic nitrogen (Setién *et al.*, 2013). In wheat, Gln concentration in leaf  
451 phloem sap was dozens of times higher than in leaf tissue, where it was preferentially  
452 loaded into the vascular tissue for translocation (Duan *et al.*, 2000). Peeters and Van  
453 Laere (1994) pointed out that Gln has an amazing reverse concentration loading  
454 efficiency to vascular tissue. Therefore, it can be considered that TaGS1;2, which is  
455 mainly distributed around the vascular tissues, can rapidly accumulate Gln around the  
456 vascular tissues, thus promoting the reverse concentration loading of Gln to the  
457 vascular tissues. TaGS1;1 activity also increased with increasing Gln concentration,  
458 but far less than that of TaGS1;2 (Fig. 2C). Only when no N was supplied, TaGS1;1  
459 was found surrounding vessels of xylem (Fig. 5A). These results indicate that

460 TaGS1;1 is also involved in loading Gln to the vascular tissues, but less importance  
461 than TaGS1;2. TaGS1;2 activity was inhibited by higher Glu concentration (Fig. 2A),  
462 indicating the reverse concentration loading of Gln may be inhibited by high Glu  
463 concentration.

464 The affinity of TaGS1;3 to Glu and hydroxylamine was lower than that of  
465 TaGS1;1, but it had the highest  $V_{\max}$  (Table 1), indicating that TaGS1;3 has strong  
466  $\text{NH}_4^+$  assimilation ability. The activity of TaGS1;3 was not affected by Gln (Fig. 3C),  
467 suggesting that TaGS1;3 did not participate in the reverse concentration loading  
468 process of Gln. TaGS1;3 was significantly promoted by the external supply of  $\text{NH}_4^+$   
469 (Fig. 3C, E, F), and located in pericycle cells of root and leaf mesophyll cells (Fig. 5G,  
470 H), indicating that TaGS1;3 mainly performs rapid  $\text{NH}_4^+$  assimilation at high external  
471  $\text{NH}_4^+$  concentration, which can prevent the toxicity of high  $\text{NH}_4^+$  concentration from  
472 cells. The root grows rapidly (Table S4) both under medium without N and  $\text{NO}_3^-$   
473 medium, and a large amount of TaGS1;3 was distributed in the meristematic zone of  
474 roots (Fig. 5C, F), indicating that TaGS1;3 was also involved in the assimilation of  
475  $\text{NH}_4^+$  coming from the metabolism process of rapidly growing roots.

476 Wheat grows in soils with constantly changing available N forms and  
477 concentrations. Therefore, it is difficult for a single TaGS to complete all nitrogen  
478 assimilation tasks. Without external nitrogen, the roots no longer absorb inorganic  
479 nitrogen, resulting in soluble sugars, carbon skeletons for nitrogen assimilation,  
480 accumulation in the roots (Fig. 4B). At the same time, the shoot growth was inhibited  
481 due to the lack of nitrogen (Table S4), resulting in the accumulation of photosynthetic  
482 products (soluble sugars) in the leaves (Fig. 4B). N stress can cause leaf senescence,  
483 promoting proteolysis and N remobilization (Caputo *et al.*, 2009), but roots  
484 (meristematic zone) growth was promoted significantly (Table S4) for nitrogen stored  
485 in the leaves may be mobilized and translocated through the phloem to the  
486 meristematic zone for root growth. During this process, ammonia released by the  
487 degradation of nitrogen-containing substances in the leaves was mainly assimilated

488 into Gln by TaGS1;1 located in the mesophyll cells (Fig. 5A), and then loaded into the  
489 vessels by TaGS1;1 and TaGS1;2 and distributed around the xylem vessels (Fig. 5A  
490 and Fig. 6A). The xylem vessels and phloem sieve tube can exchange substances  
491 (Han *et al.*, 1986), so Gln loaded into the vessels can also enter the phloem sieve tube.  
492 TaGS1;1 was mainly distributed in vascular bundles (Fig. 5A) to translocate of Gln in  
493 the roots. TaGS1;1 and TaGS1;3 were distributed in the meristematic zone of roots  
494 (Fig. 5C), and they jointly participated in the assimilation of ammonia produced  
495 during the growth and metabolism of cells (Fig. 6A).

496 When  $\text{NO}_3^-$  was supplied, it will be firstly translocated to the shoot through the  
497 xylem and reduced to  $\text{NH}_4^+$  in the chloroplast of leaves, and then be assimilated into  
498 Gln by TaGS2. Some Gln remains in the leaves for leaf growth, some can be loaded  
499 into xylem by TaGS1;2 and translocated to other parts through phloem (Fig. 6B).  
500 However, the more  $\text{NO}_3^-$  was supplied, the more TaGS2 was induced in the leaves and  
501 roots (Fig. 3D, E, F), and the more  $\text{NH}_4^+$  was located in the roots (Fig. 4A), indicating  
502 that  $\text{NO}_3^-$  reduction and assimilation occurred both in the leaves and roots. TaGS1;1,  
503 TaGS1;3, and TaGS2 were found in the pericycle of maturation zone of roots, whereas  
504 TaGS1;2 was mainly distributed around the xylem vessels (Fig. 5E), indicating that  
505 Gln was synthesized by TaGS1;1, TaGS1;3, and TaGS2 together, and then  
506 translocated to the shoot via xylem by TaGS1;2 (Fig. 6B). Most  $\text{NO}_3^-$  is translocated  
507 to shoot and stored in vacuoles of mesophyll cells or directly stored in vacuoles of  
508 root cells (Xu *et al.*, 2012) for a large accumulation of  $\text{NO}_3^-$  in the shoot and root (Fig.  
509 S2). However, the free amino acid content was very low under  $\text{NO}_3^-$  supply (Fig. 4C)  
510 and the content of Gln and Asn (i.e., the organic N translocation forms) were  
511 significantly lower than under  $\text{NH}_4^+$  supply (Fig. 4E, G), indicating that  $\text{NO}_3^-$  was the  
512 most important form for nitrogen translocation and storage.

513  $\text{NH}_4^+$  is an important inorganic nitrogen source, but high  $\text{NH}_4^+$  concentration  
514 tends to produce  $\text{NH}_4^+$  toxicity to plants (Wang *et al.*, 2016).  $\text{NH}_4^+$  penetrating into  
515 roots has to be immediately assimilated to Gln by GS to prevent  $\text{NH}_4^+$  toxicity

516 (Funayama *et al.*, 2013). Growing in an environment with a large amount of  $\text{NH}_4^+$ ,  
517 plants will accumulate a large amount of ammonium (Belastegui-Macadam *et al.*,  
518 2007) and maintain high levels of inorganic nitrogen assimilation in the roots to  
519 protect the photosynthetic parts of the plant against ammonium toxicity (Aarnes *et al.*,  
520 2007; Cruz *et al.*, 2006; Hollstein *et al.*, 2010). In our study, with the increase of  $\text{NH}_4^+$   
521 supply,  $\text{NH}_4^+$  was accumulated in the root (Fig. 4A) and the root growth was inhibited  
522 (Table S4), which allowed the carbon skeleton from the shoot to be used for  $\text{NH}_4^+$   
523 assimilation. The meristematic zone of roots stopped cell division and differentiated  
524 into vascular tissue (Fig. 5I), which helped assimilate products translocation to the  
525 shoot in time. During this process, a large amount of TaGS1;1, TaGS1;2, and TaGS1;3  
526 distributed in the root tips consumed the carbon skeleton translocated from the shoot  
527 for nitrogen assimilation (Fig. 6C), resulting in a decrease in soluble sugar content in  
528 the root (Fig. 4B). A large amount of TaGS1;2 was distributed in the vascular tissue of  
529 root tips (Fig. 5I), which helped to load Gln to the vascular tissue (Fig. 6C).  
530 Asparagine is another main compound for N storage and translocation due to its high  
531 N/C ratio and stability (Ikeda *et al.*, 2004). It is synthesized by asparagine synthase  
532 (AS) by the amidation of aspartate (Asp) using Gln as amino donor (Ikeda *et al.*,  
533 2004). As an excellent compound in the carbon economy of nitrogen translocation  
534 from roots to shoot, Gln in the root may be transformed into Asn by AS.

535       When the external  $\text{NH}_4^+$  exceeds the maximum amount stored and assimilated by  
536 the roots,  $\text{NH}_4^+$  may be translocated to the shoot through the xylem and assimilated in  
537 the leaf. In leaves, TaGS1;1 and TaGS1;3 were distributed in the mesophyll cells (Fig.  
538 5G), and they may jointly participate in the assimilation of  $\text{NH}_4^+$  (Fig. 6). Part of Gln  
539 can then be loaded into the vascular tissue by TaGS1;2, distributed in the surrounding  
540 vessels of xylem and phloem companion cells (Fig. 5G), and translocated to the tissue  
541 short of nitrogen (Fig. 6C).

542       Based on the above, we can conclude that TaGS1;1 is the primary TaGS1  
543 isozyme for N assimilation, TaGS1;2 mainly participates in the reverse concentration

544 loading of Gln into vascular tissues, TaGS1;3 participates in  $\text{NH}_4^+$  assimilation of root  
545 tip and detoxification of  $\text{NH}_4^+$ , and they are synergistically perform nitrogen  
546 assimilation and translocation (Fig. 6). Many studies have suggested that GS1 is  
547 closely related to crop nitrogen use efficiency (Funayama *et al.*, 2013; Guan *et al.*,  
548 2015; Martin *et al.*, 2006; Sakurai *et al.*, 1996; Tabuchi *et al.*, 2005; Zhang *et al.*,  
549 2017). However, the outcome of one GS1 overexpression has generally been  
550 inconsistent (Thomsen *et al.*, 2014). Considering the synergies of the three TaGS1  
551 isozymes, they should be considered simultaneously to achieve the aim of improving  
552 wheat NUE.

### 553 **Supplemental date:**

554 **Fig. S1** DNA Star multiple alignment of wheat glutamine synthetase amino acid  
555 sequences.

556 **Fig. S2** Effect of  $\text{NO}_3^-$  supply on the content of  $\text{NO}_3^-$  in the shoot and root.

557 **Table S1** The antigenicity, hydrophilic, and surface accessibility of the TaGS isoform  
558 specific peptides sequence.

559 **Table S2** Composition of nutrient solution treated with different nitrogen sources.

560 **Table S3** List of primers used for qPCR.

561 **Table S4** Effect of nitrogen regimes on dry weight, fresh weight, root length, and  
562 nitrogen content.

### 563 **Acknowledgements**

564 We thank the Modern Agricultural Technology System in Henan province  
565 (S2010-01-G04) and the 13th five-year national key research and development plan of  
566 China (2016YFD0300205 and 2016YFD0300609) for supporting this research.

### **References**

Aarnes H, Eriksen AB, Petersen D, Rise F. 2007. Accumulation of ammonium in Norway spruce (*Picea abies*) seedlings measured by in vivo  $^{14}\text{N}$ -NMR. *Journal of Experimental Botany*

58, 929-934.

**Belastegui-Macadam XM, Estavillo JM, García-Mina JM, González A, Bastias E, González-Murua C.** 2007. Clover and ryegrass are tolerant species to ammonium nutrition. *Journal of Plant Physiology* **164**, 1583-1594.

**Bernard SM, Habash DZ.** 2009. The importance of cytosolic glutamine synthetase in nitrogen assimilation and recycling. *New Phytologist* **182**, 608-620.

**Bernard SM, Møller ALB, Dionisio G, et al.** 2008. Gene expression, cellular localisation and function of glutamine synthetase isozymes in wheat (*Triticum aestivum* L.). *Plant Molecular Biology* **67**, 89-105.

**Cañas RA, Quilleré I, Lea PJ, Hirel B.** 2010. Analysis of amino acid metabolism in the ear of maize mutants deficient in two cytosolic glutamine synthetase isoenzymes highlights the importance of asparagine for nitrogen translocation within sink organs. *Plant Biotechnology Journal* **8**, 966-978.

**Caputo C, Criado MV, Roberts IN, Gelso MA, Bameix AJ.** 2009. Regulation of glutamine synthetase 1 and amino acids transport in the phloem of young wheat plants. *Plant Physiology and Biochemistry* **47**, 335-342.

**Cruz C, Bio AFM, Domínguez-Valdivia MD, Aparicio-Tejo PM, Lamsfus C, Martins-Loução MA.** 2006. How does glutamine synthetase activity determine plant tolerance to ammonium? *Planta* **223**, 1068-1080.

**Duan L, He Z, Han B.** 2000. Composition and Transport of Amino Acids in Wheat Plant during Grain Development. *Journal of Triticeae Crops* **20**, 17-22.

**Fuentes SI, Allen DJ, Ortiz-Lopez A, Hernández G.** 2001. Over-expression of cytosolic glutamine synthetase increases photosynthesis and growth at low nitrogen concentrations. *Journal of Experimental Botany* **52**, 1071-1081.

**Funayama K, Kojima S, Tabuchi-Kobayashi M, Sawa Y, Nakayama Y, Hayakawa T, Yamaya T.** 2013. Cytosolic Glutamine Synthetase1;2 is Responsible for the Primary Assimilation of Ammonium in Rice Roots. *Plant and Cell Physiology* **54**, 934-943.

**Goodall AJ, Kumar P, Tobin AK.** 2013. Identification and Expression Analyses of Cytosolic Glutamine Synthetase Genes in Barley (*Hordeum vulgare* L.). *Plant and Cell Physiology* **54**, 492-505.

**Gu M, Wei Y, Jia X, Xiong S, Ma X, Wang X.** 2018. Expression characteristics of glutamine synthetase of wheat in *Escherichia coli*. *Chinese Journal of Biotechnology* **34**, 264-274.

**Guan M, de Bang TC, Pedersen C, Schjoerring JK.** 2016. Cytosolic Glutamine Synthetase Gln1;2 Is the Main Isozyme Contributing to GS1 Activity and Can Be Up-Regulated to Relieve Ammonium Toxicity. *Plant Physiology* **171**, 1921-1933.

**Guan M, Møller I, Schjoerring J.** 2015. Two cytosolic glutamine synthetase isoforms play specific roles for seed germination and seed yield structure in *Arabidopsis*. *Journal of Experimental Botany* **66**, 203-212.

**Han J, Wang R, Jia Z.** 1986. *The transport of assimilates in plants*. Beijing: Science Press.

**Hirel B, Martin A, Tercé-Laforgue T, Gonzalez-Moro MB, Estavillo JM.** 2005. Physiology of maize I: A comprehensive and integrated view of nitrogen metabolism in a C4 plant. *Physiologia Plantarum* **124**, 167-177.



**Hollstein M, Montesano R, Yamasaki H.** 2010. Ammonium tolerance and the regulation of two cytosolic glutamine synthetases in the roots of Sorghum. *Functional Plant Biology* **37**, 55-63.

**Ikeda M, Kusano T, Koga N.** 2004. Carbon skeletons for amide synthesis during ammonium nutrition in tomato and wheat roots. *Soil Science & Plant Nutrition* **50**, 141-147.

**Ishiyama K, Inoue E, Tabuchi M, Yamaya T, Takahashi H.** 2004a. Biochemical background and compartmentalized functions of cytosolic glutamine synthetase for active ammonium assimilation in rice roots. *Plant and Cell Physiology* **45**, 1640-1647.

**Ishiyama K, Inoue E, Watanabe-Takahashi A, Obara M, Yamaya T, Takahashi H.** 2004b. Kinetic properties and ammonium-dependent regulation of cytosolic isoenzymes of glutamine synthetase in Arabidopsis. *Journal of Biological Chemistry* **279**, 16598-16605.

**Kant S, Bi Y, Rothstein SJ.** 2010. Understanding plant response to nitrogen limitation for the improvement of crop nitrogen use efficiency. *Journal of Experimental Botany* **62**, 1499-1509.

**Kaur G, Asthir B, Bains NS, Farooq M.** 2015. Nitrogen Nutrition, its Assimilation and Remobilization in Diverse Wheat Genotypes. *International Journal of Agriculture & Biology* **17**, 531-538.

**Kichey T, Heumez E, Pocholle D, Pageau K, Vanacker H, Dubois F, Le Gouis J, Hirel B.** 2006. Combined agronomic and physiological aspects of nitrogen management in wheat highlight a central role for glutamine synthetase. *New Phytologist* **169**, 265-278.

**Konishi N, Ishiyama K, Beier MP, Inoue E, Kanno K, Yamaya T, Takahashi H, Kojima S.** 2017. Contributions of two cytosolic glutamine synthetase isozymes to ammonium assimilation in Arabidopsis roots. *Journal of Experimental Botany* **68**, 613-625.

**Kusano M, Tabuchi M, Fukushima A, *et al.*** 2011. Metabolomics data reveal a crucial role of cytosolic glutamine synthetase 1;1 in coordinating metabolic balance in rice. *The Plant Journal* **66**, 456-466.

**Lothier J, Gaufichon L, Sormani R, Lemaître T, Azzopardi M, Morin H, Chardon F, Reisdorf-Cren M, Avice J-C, Masclaux-Daubresse C.** 2011. The cytosolic glutamine synthetase GLN1; 2 plays a role in the control of plant growth and ammonium homeostasis in *Arabidopsis* rosettes when nitrate supply is not limiting. *Journal of Experimental Botany* **62**, 1375-1390.

**Ma X, Li L, Zhao P, Xiong S, Guo F.** 2005. Effect of water control on activities of nitrogen assimilation enzymes and grain quality in winter wheat. *Acta Phytocologica Sinica* **29**, 48-53.

**Martin A, Belastegui-Macadam X, Quillere I, Floriot M, Valadier MH, Pommel B, Andrieu B, Donnison I, Hirel B.** 2005. Nitrogen management and senescence in two maize hybrids differing in the persistence of leaf greenness: agronomic, physiological and molecular aspects. *New Phytologist* **167**, 483-492.

**Martin A, Lee J, Kichey T, *et al.*** 2006. Two Cytosolic Glutamine Synthetase Isoforms of Maize Are Specifically Involved in the Control of Grain Production. *Plant Cell* **18**, 3252-3274.

**Moison M, Marmagne A, Dinant S, *et al.*** 2018. Three cytosolic glutamine synthetase isoforms localized in different-order veins act together for N remobilization and seed filling in *Arabidopsis*. *Journal of Experimental Botany* **69**, 4379-4393.

**Németh E, Nagy Z, Pécsváradi A.** 2018. Chloroplast Glutamine Synthetase, the Key Regulator of Nitrogen Metabolism in Wheat, Performs Its Role by Fine Regulation of Enzyme Activity via

Negative Cooperativity of Its Subunits. *Frontiers in Plant Science* doi: 10.3389/fpls.2018.00191.

**Nigro D, Fortunato S, Giove SL, Paradiso A, Gu YQ, Blanco A, de Pinto MC, Gadaleta A.** 2016. Glutamine synthetase in Durum Wheat: Genotypic Variation and Relationship with Grain Protein Content. *Frontiers in Plant Science* doi: 10.3389/fpls.2016.00971.

**Oliveira IC, Brears T, Knight TJ, Clark A, Coruzzi GM.** 2002. Overexpression of cytosolic glutamine synthetase. Relation to nitrogen, light, and photorespiration. *Plant Physiology* **129**, 1170-1180.

**Paolacci AR, Tanzarella OA, Porceddu E, Ciaffi M.** 2009. Identification and validation of reference genes for quantitative RT-PCR normalization in wheat. *BMC Molecular Biology* doi: 10.1186/1471-2199-10-11.

**Peeters KMU, Van Laere AJ.** 1994. Amino acid metabolism associated with N-mobilization from the flag leaf of wheat (*Triticum aestivum* L.) during grain development. *Plant, Cell & Environment* **17**, 131-141.

**Robertson GP, Vitousek PM.** 2009. Nitrogen in Agriculture: Balancing the Cost of an Essential Resource. *Annual Review of Environment and Resources* **34**, 97-125.

**Sakurai N, Hayakawa T, Nakamura T, Yamaya T.** 1996. Changes in the cellular localization of cytosolic glutamine synthetase protein in vascular bundles of rice leaves at various stages of development. *Planta* **200**, 306-311.

**Setién I, Fuertes-Mendizabal T, González A, Aparicio-Tejo PM, González-Murua C, González-Moro MB, Estavillo JM.** 2013. High irradiance improves ammonium tolerance in

wheat plants by increasing N assimilation. *Journal of Plant Physiology* **170**, 758-771.

**Sivasankar S, Oaks A.** 1996. Nitrate assimilation in higher plants: the effect of metabolites and light. *Plant Physiology and Biochemistry* **34**, 609-620.

**Sun FF, Wang Z, Mao XY, Zhang CW, Wang DS, Wang X, Hou XL.** 2015. Overexpression of BcGS2 gene in non-heading Chinese cabbage (*Brassica campestris*) enhanced GS activity and total amino acid content in transgenic seedlings. *Scientia Horticulturae* **186**, 129-136.

**Tabuchi M, Sugiyama K, Ishiyama K, Inoue E, Sato T, Takahashi H, Yamaya T.** 2005. Severe reduction in growth rate and grain filling of rice mutants lacking OsGS1;1, a cytosolic glutamine synthetase1;1. *The Plant Journal* **42**, 641-651.

**Tang Z.** 1999. *Guidelines for modern plant physiology experiments*. Beijing: Science Press.

**Thomsen HC, Eriksson D, Møller IS, Schjoerring JK.** 2014. Cytosolic glutamine synthetase: a target for improvement of crop nitrogen use efficiency? *Trends in Plant Science* **19**, 656-663.

**Tobin A, Ridley S, Stewart G.** 1985. Changes in the activities of chloroplast and cytosolic isoenzymes of glutamine synthetase during normal leaf growth and plastid development in wheat. *Planta* **163**, 544-548.

**Wallsgrave RM, Turner JC, Hall NP, Kendall AC, Bright SW.** 1987. Barley mutants lacking chloroplast glutamine synthetase—biochemical and genetic analysis. *Plant Physiology* **83**, 155-158.

**Wang F, Gao J, Liu Y, Tian Z, Muhammad A, Zhang Y, Jiang D, Cao W, Dai T.** 2016. Higher Ammonium Transamination Capacity Can Alleviate Glutamate Inhibition on Winter Wheat (*Triticum aestivum* L.) Root Growth under High Ammonium Stress. *PLOS ONE* doi:

10.1371/journal.pone.0160997.

**Wang X, Wei Y, Shi L, Ma X, Theg SM.** 2015. New isoforms and assembly of glutamine synthetase in the leaf of wheat (*Triticum aestivum* L.). *Journal of Experimental Botany* **66**, 6827-6834.

**Wei Y, Shi A, Jia X, Zhang Z, Ma X, Gu M, Meng X, Wang X.** 2018. Nitrogen Supply and Leaf Age Affect the Expression of TaGS1 or TaGS2 Driven by a Constitutive Promoter in Transgenic Tobacco. *Genes* **9**, 406.

**Xu G, Fan X, Miller AJ.** 2012. Plant Nitrogen Assimilation and Use Efficiency. *Annual Review of Plant Biology* **63**, 153-182.

**Yamaya T, Kusano M.** 2014. Evidence supporting distinct functions of three cytosolic glutamine synthetases and two NADH-glutamate synthases in rice. *Journal of Experimental Botany* **65**, 5519-5525.

**Zhang Z, Xiong S, Wei Y, Meng X, Wang X, Ma X.** 2017. The role of glutamine synthetase isozymes in enhancing nitrogen use efficiency of N-efficient winter wheat. *Scientific Reports* doi: 10.1038/s41598-017-01071-1.

## Tables

**Table 1** The kinetic properties of the wheat GS isoenzymes

|         | $K_m^*$ (mM) |               | $V_{max}^\#$ (nKat/1 unit protein) |               |
|---------|--------------|---------------|------------------------------------|---------------|
|         | Glu          | Hydroxylamine | Glu                                | Hydroxylamine |
| TaGS1;1 | 0.65±0.01 d  | 0.26±0.02 c   | 0.13±0.001 d                       | 0.1±0.002 d   |
| TaGS1;2 | 0.87±0.01 c  | 0.66±0.003 a  | 0.5±0.002 c                        | 0.36±0.003 c  |
| TaGS1;3 | 4.13±0.35 a  | 0.64±0.04 a   | 1.63±0.06 a                        | 1.36±0.07 a   |
| TaGS2   | 2.43±0.27 b  | 0.36±0.04 b   | 0.79±0.03 b                        | 0.85±0.03 b   |

\* For TaGS1;1, TaGS1;2, TaGS1;3 and TaGS2, the concentration of Glu used for curve fitting was 0-40mM, 0-5 mM, 0-120 mM and 0-120 mM, respectively; the concentration of hydroxylamine used for curve fitting was 0-80 mM, 0-50 mM, 0-30 mM and 0-80 mM, respectively. The volume of individual recombinant wheat GS isozymes crude extract, with 200  $\mu$ L of TaGS1;1, 150  $\mu$ L of TaGS1;2, 450  $\mu$ L of TaGS1;3 and 300  $\mu$ L TaGS2 were used for the GS enzyme assays.

# One kat of enzyme activity was defined as 1 mol GMH synthesized per second at 25°C.

Data are means of three independent biological replicates  $\pm$  SD. The different letters above each sample indicate statistically significant differences where  $P < 0.05$  according to one-way ANOVA Duncan post-hoc test.

## Figure legends

**Fig. 1** Cross-reactivity of anti-GS antibodies to the individual recombinant wheat GS proteins (A) and the wheat GS proteins in different tissues (B). The dilution ratio of the anti-TaGS, anti-TaGS1;1, anti-TaGS2 anti-TaGS1;2 and anti-TaGS1;3 antibody, is 1:5000, 1:30000, 1:10000, 1:30000 and 1:10000, respectively.

**Fig. 2** The activity of individual recombinant wheat GS isozymes in relation to additional Glu (A), hydroxylamine (B) and Gln (C). The TaGS1;2 activity was measured when Glu was supplied at the concentrations 0-5 mM (D). The TaGS1;2 activity was measured at the different concentrations of hydroxylamine when Glu was supplied at the 5mM (E). The volume of individual recombinant wheat GS isozymes crude extract, with 200  $\mu$ L of TaGS1;1, 150  $\mu$ L of TaGS1;2, 450  $\mu$ L of TaGS1;3 and 300  $\mu$ L TaGS2 were used for the GS enzyme assays. The relative GS protein content of recombinant wheat GS isozymes crude extract (F). Upper panel showed the TaGS immunoblot and lower panel showed the quantified intensity of the TaGS Western bands present in upper panel. Data represent means  $\pm$  SE of at least three replicates.

**Fig. 3** TaGS gene expression and GS activity in response to different nitrogen regimes in the shoot and root tissue. Quantitative RT-PCR analysis of TaGS1;1 (A), TaGS1;2 (B), TaGS1;3 (C) and TaGS2 (D) gene expression, horizontal axes present the N absence and the millimolar concentration of  $\text{NO}_3^-$  and  $\text{NH}_4^+$  treatments, vertical axes present the mean relative expression of each isoform normalized to the reference genes *TaATPase* and *TaTEF*. Western-blot analysis of TaGS, TaGS1;1, TaGS1;2, TaGS1;3 and TaGS2 protein contents in shoot (E) and root (F), 15  $\mu$ g of soluble proteins extracted from the tissues were loaded onto each lane and detected by the anti-TaGS, anti-TaGS1;1, anti-TaGS1;2, anti-TaGS1;3 and anti-TaGS2 antibody, respectively and the dilution ratio of antibody applied to the membrane is the dilution ratio of antibody is 1:5000, 1:30000, 1:30000,

1:10000 and 1:10000, respectively. Native electrophoresis and in-gel GS activity staining (G) showing the GS holoenzymes in shoot and root; The total GS activity (H) in shoot and root tissue under different N regimes. Data are means of three independent biological replicates  $\pm$  SD. The different letters above each sample indicate statistically significant differences where  $P < 0.05$  according to one-way ANOVA Duncan post-hoc test.

**Fig. 4** Carbon and nitrogen metabolite levels in response to different nitrogen regimes in the shoot and root tissue. The ammonium (A), soluble sugar (B), free amino acid (C) and soluble protein content (D) were determined. Individual amino acid components in response to different nitrogen regimes in the shoot and root tissue. The amino acid components were analyzed with thin layer chromatography (TLC) and ninhydrin colouring showing the amino acid components in shoot (E) and root (G). F showed the separation results of five amino acids (Gln, Ala, Asn, Glu and Asp) under the same conditions. 1.5  $\mu$ g of free amino acid extracted from the shoot and root tissues were loaded onto each lane of the TLC. Data are means of three independent biological replicates  $\pm$  SD. The different letters above each sample indicate statistically significant differences where  $P < 0.05$  according to one-way ANOVA Duncan post-hoc test.

**Fig. 5** Tissue localization of individual TaGS. Immunolocalization of TaGS1;1, TaGS1;2, TaGS1;3 and TaGS2 in response to different nitrogen regimes in a transverse section of the leaf (A, D, G), the maturation zone (B, E, H) and meristematic zone (C, F, I) of root tissue. DAPI glowed blue by UV excitation wavelength 330-380 nm and emission wavelength 420 nm; FITC glowed green by excitation wavelength 465-495 nm and emission wavelength 515-555 nm. e, epidermis; MX, metaxylem; P, phloem; X, xylem; VB, vascular bundle; CMX, central metaxylem; End, endodermis; Pr, pericycle; Co, cortex; MC, mesophyll cells.

**Fig. 6** Schematic model of individual TaGS1 synergistically perform nitrogen



assimilation and translocation under the condition of N absence (A),  $\text{NO}_3^-$  supply (B) or  $\text{NH}_4^+$  supply (C). V, vessel; St, sieve tube; Cc, phloem companion cells; P, phloem; X, xylem.

**Fig. 1**

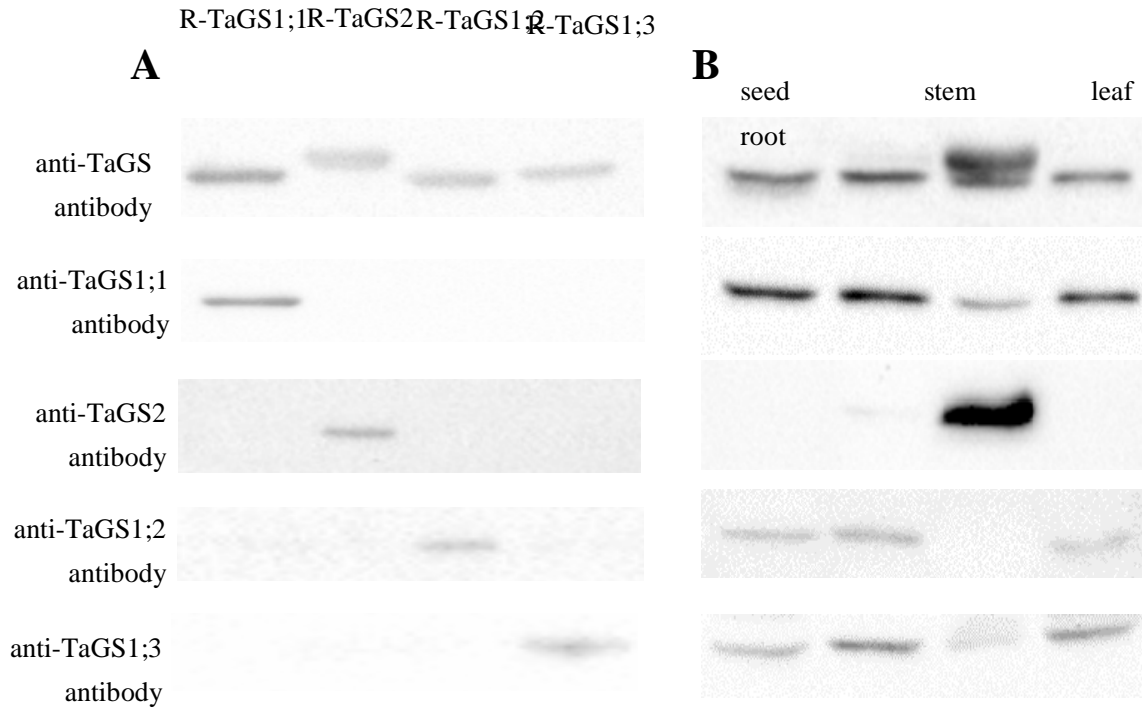

**Fig. 2**

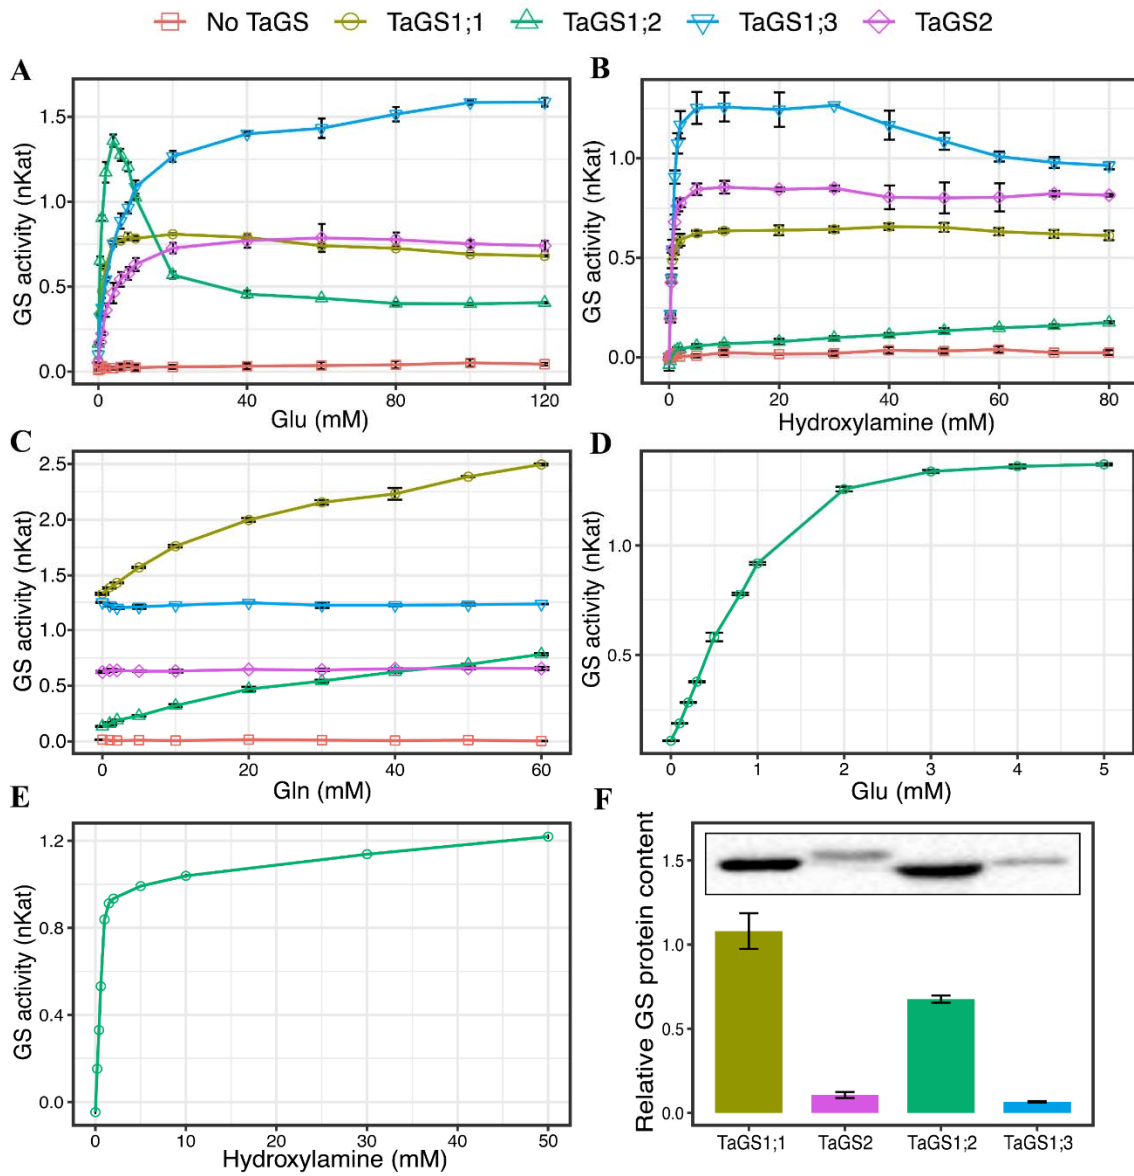

Fig. 3

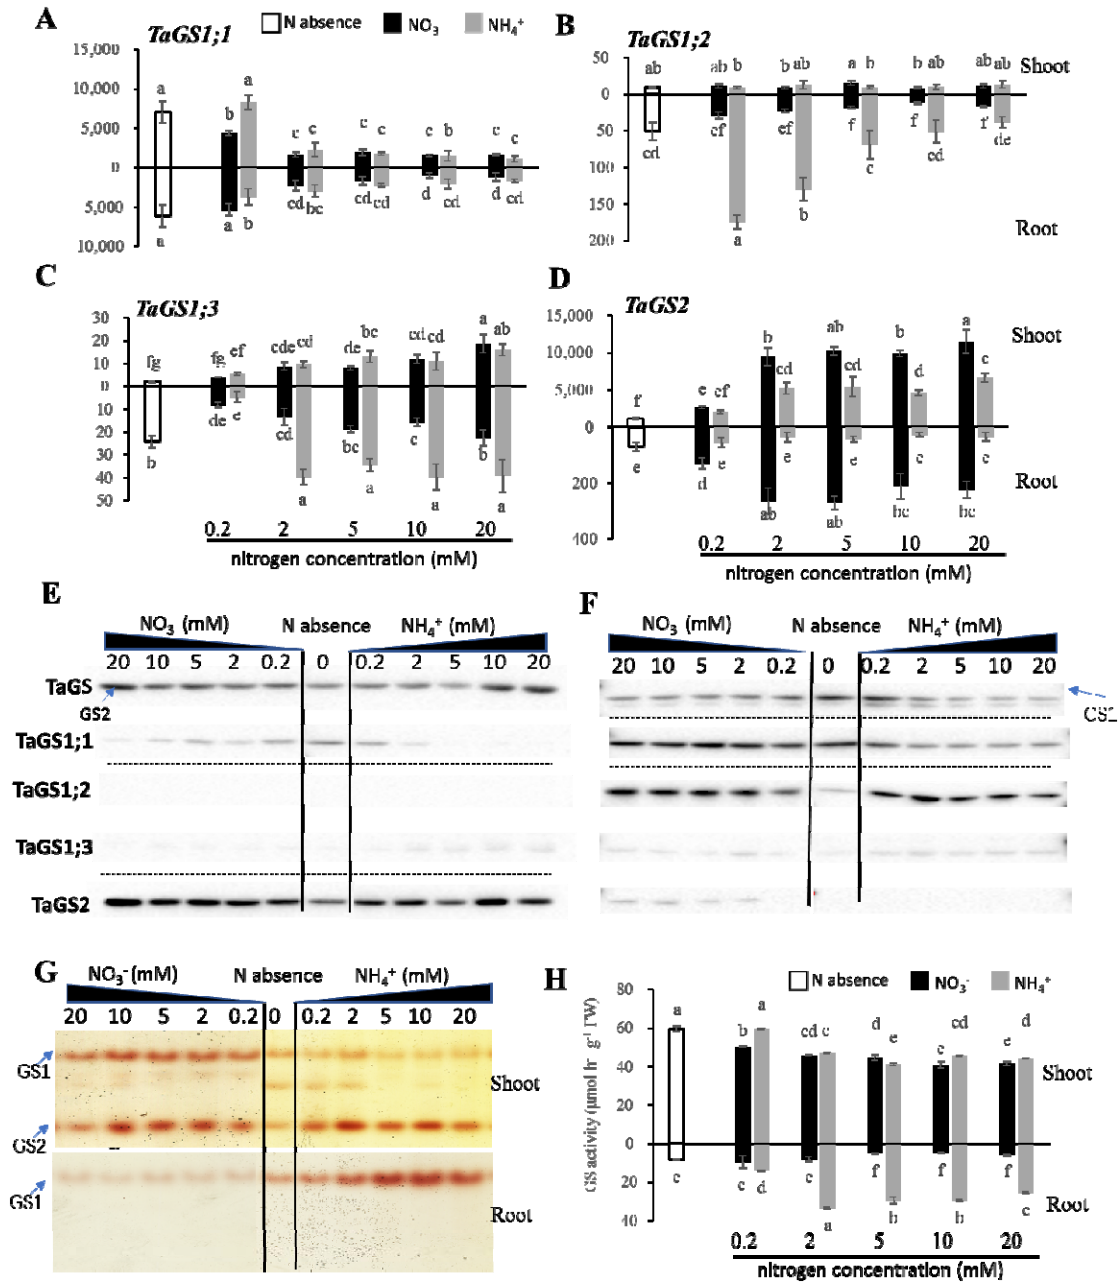

Fig. 4

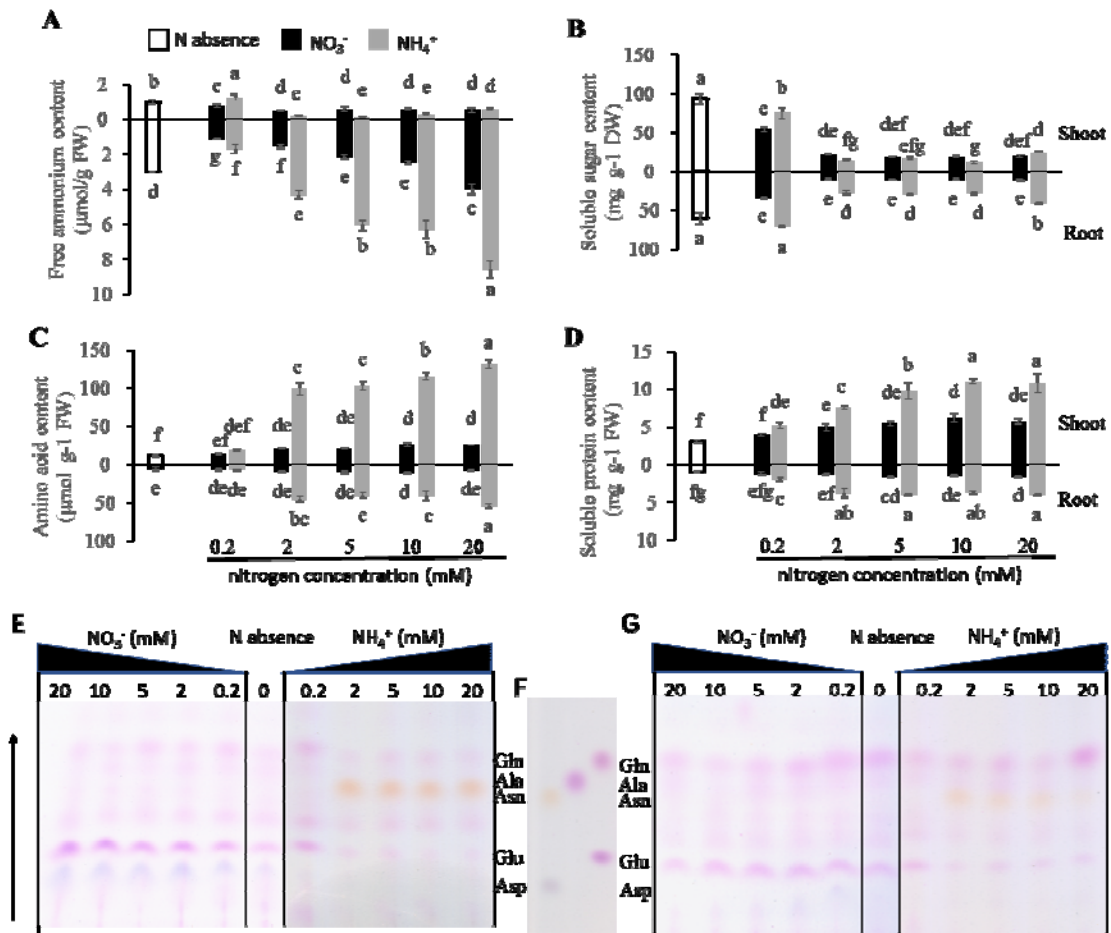

**Fig. 5**

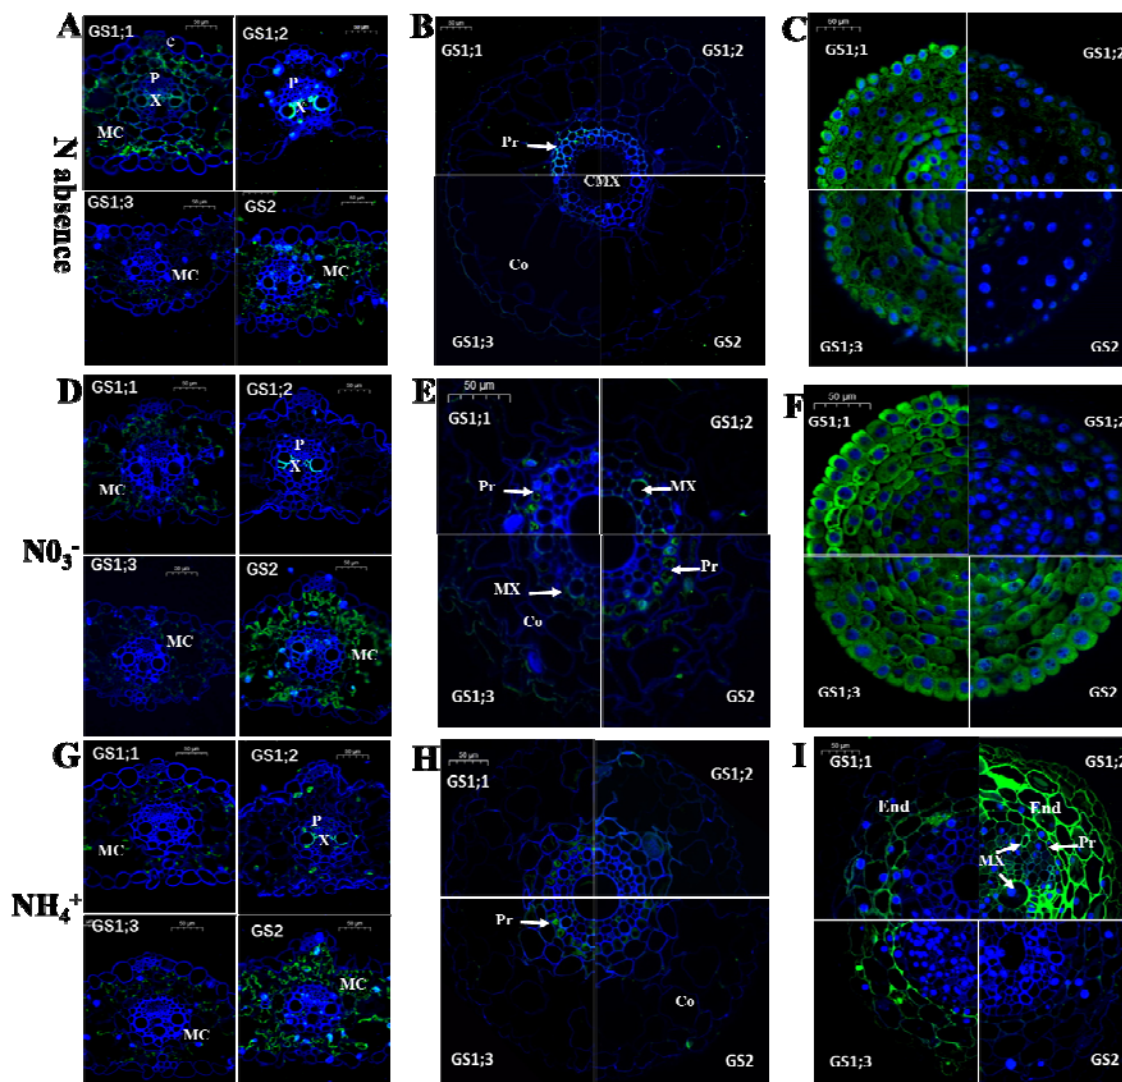

Fig. 6

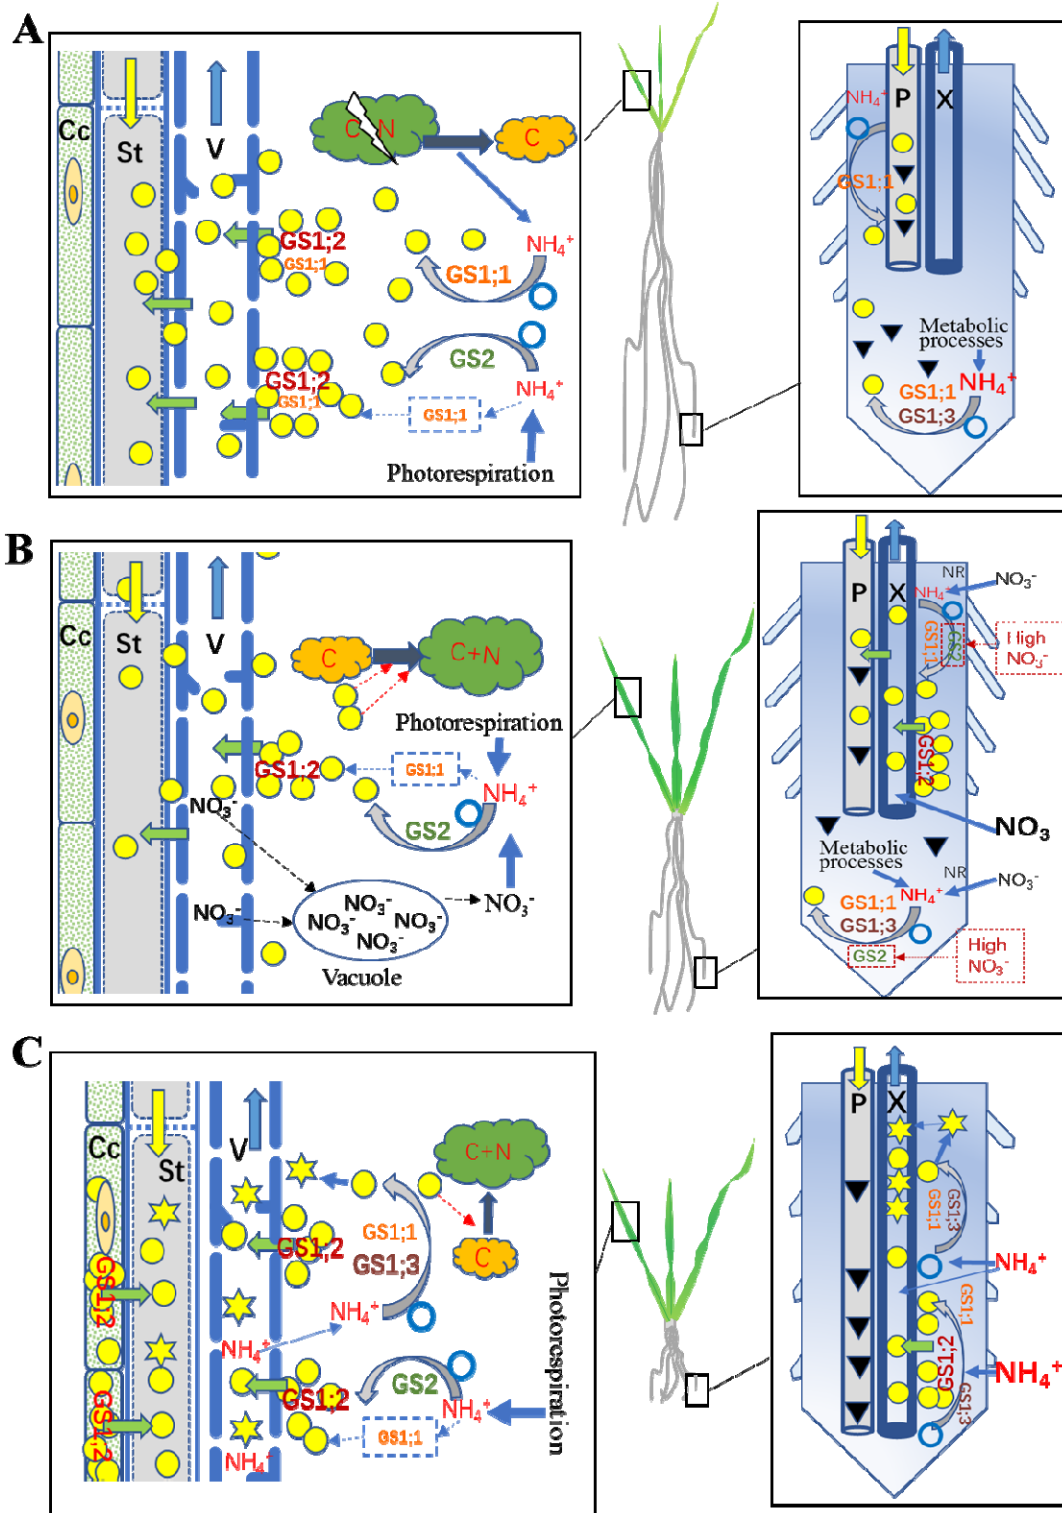

Source: https://www.biorxiv.org/content/10.1101/733857v1.full.pdf
